# Supplementary material
Source: PubMed Central journal article supplement (PMC2957790)
Supplement: supp_110.169540_JPET169540Supl_Figure_1.pdf [file supp_110.169540_JPET169540Supl_Figure_1.pdf]

## Effect of Recombinant Human Lecithin-cholesterol:acyltransferase Infusion on Lipoprotein Metabolism in Mice

Xavier Rousset, Boris Vaisman, Bruce Auerbach, Brian R. Krause,  
Reyn Homan, John Stonik, Gyorgy Csako, Robert Shamburek, Alan T. Remaley

### Supplemental Figure 1

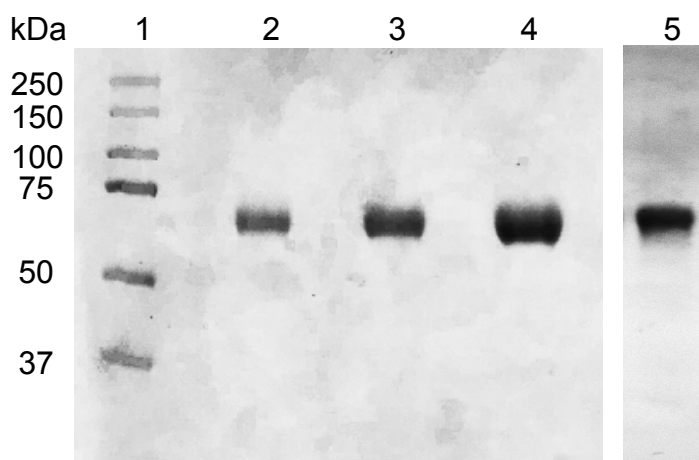

#### Supplemental Figure 1. SDS-PAGE analysis of purified rLCAT.

Purified rLCAT was analysed on a NuPAGE 10% Bis-Tris SDS-PAGE gel and stain with Coomassie Blue R250 (Lanes 1-4) or detected by immunoblotting (lane 5). Lane 1: molecular weight markers; lane 2: 1  $\mu$ g of rLCAT; lane 3: 2  $\mu$ g of rLCAT; Lane 4: 4  $\mu$ g of rLCAT. Lane 5: 0.5  $\mu$ g of rLCAT immunoblotted and detected with anti-human LCAT antibody.
